# Supplementary material for: Chronic, acute and protocol-dependent effects of exercise on psycho-physiological health during long-term isolation and confinement
Source: Research Square preprint supplement (doi:10.21203/rs.3.rs-1430231/v1), 2022-03-22
Supplement: Supplementary file 1 [file 76b4738d771ba3d2b7df0819.docx]

**Supplementary files**

**Captions**

Figure 9: Example for continuous training (CON, upper figure) and interval training (INT, lower figure) micro cycle. Day 1 of the training micro cycle is presented in blue, Day 2 in green, and day 3 in red color. The lag is provided on the x-axis in seconds (s) and treadmill on the y-axis in kilometer per hours (km h-1).

**
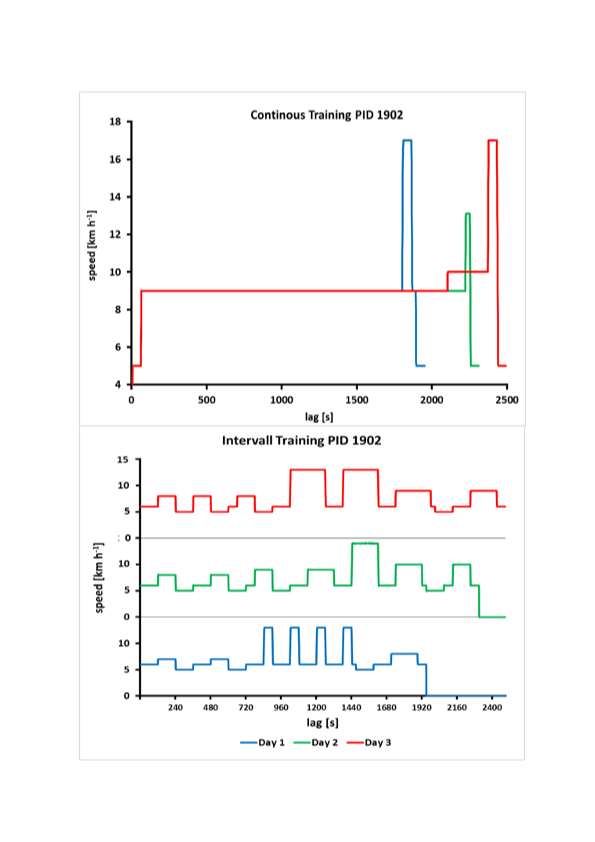
**

Figure 9: Example for continuous training (CON, upper figure) and interval training (INT, lower figure) micro cycle. Day 1 of the training micro cycle is presented in blue, Day 2 in green, and day 3 in red color. The lag is provided on the x-axis in seconds (s) and treadmill on the y-axis in kilometer per hours (km h-1).
